# Supplementary material
Source: Springer Nature journal article supplement (https://www.springermedizin.de/resource/supplementary/12884_2009_234_MOESM1_ESM.pdf/9459902)
Supplement: MOESM1 [file 9459902]

Women booked for elective LUSCS (n = 342)

- Not Eligible (n = 55)
- Anticoagulated (n = 4)
  - Preterm (n = 9)
  - Twin pregnancy (n = 9)
  - Fetal ascites (n = 1)
  - Previous classical incision (n = 1)
  - Placenta praevia/acreta (n = 14)
  - Previous PPH (n = 3)
  - Trial of labour (n = 3)
  - ECV (n = 1)
  - Polyhydramniotic (n = 3)
  - GA (n = 1)
  - Incisional hernia repair (n = 1)
  - Difficult X-match (n = 1)
  - Portal vein varices (n = 1)
  - Uterine fibroid (n = 1)
  - IUD (n = 1)
  - Tubal ligation (n = 1)

Eligible women (n = 287)

- Not consented (n = 172)
- Not approached (n = 115)
  - Delivered prior to booked date (n = 31)
  - Declined (n = 26)

Randomised (n = 115)

- Protocol violation (n = 5)
- GA (n = 2)
  - Previous PPH (n = 1)
  - Midwife error (n = 1)
  - Myomectomy (n = 1)

Placebo (n = 54)

Syntocinon Infusion (n = 56)
